# Supplementary material for: Smartphone Addiction and Associated Health Outcomes in Adult Populations: A Systematic Review
Source: MDPI journal article supplement (doi:10.3390/ijerph182212257), 2021-11-22
Supplement: s1 [file s1]

**Table S1. Electronic search strategy**

| <b>Database</b>       | <b>Search Terms</b>                                                                                                                                                                                                                                                                                                                                                                                                                                                                                       | <b>Records Identified</b> |
|-----------------------|-----------------------------------------------------------------------------------------------------------------------------------------------------------------------------------------------------------------------------------------------------------------------------------------------------------------------------------------------------------------------------------------------------------------------------------------------------------------------------------------------------------|---------------------------|
| <b>PubMed</b>         | ((smartphone) AND (((addiction) OR (overuse)) OR (problematic use)) OR (excessive use))) AND (adults) Filters: Full text, Humans, Adult: 19+ years, English, from 2011/1/1 - 2021/7/31                                                                                                                                                                                                                                                                                                                    | <b>234</b>                |
| <b>Scopus</b>         | ( TITLE-ABS-KEY ( smartphone ) AND TITLE-ABS-KEY ( addiction ) OR TITLE-ABS-KEY ( overuse ) OR TITLE-ABS-KEY ( problematic AND use ) OR TITLE-ABS-KEY ( excessive AND use ) AND TITLE-ABS-KEY ( adults ) AND NOT TITLE-ABS-KEY ( children ) ) AND PUBYEAR > 2010 AND ( LIMIT-TO ( PUBSTAGE , "final" ) ) AND ( LIMIT-TO ( OA , "all" ) ) AND ( LIMIT-TO ( EXACTKEYWORD , "Human" ) ) AND ( LIMIT-TO ( LANGUAGE , "English" ) )                                                                            | <b>491</b>                |
| <b>Medline</b>        | TI Smartphone AND TI Addiction OR TI Overuse OR TI Problematic use OR TI Excessive use AND TI Adults<br><br>Limiters - Full Text; Date of Publication: 20110101-20210731; English Language; Human; Age Related: All Adult: 19+ years; Scholarly (Peer Reviewed)                                                                                                                                                                                                                                           | <b>365</b>                |
| <b>Web of Science</b> | <b>TITLE:</b> (Smartphone) <i>AND</i> <b>TITLE:</b> (Addiction) <i>OR</i> <b>TITLE:</b> (Overuse) <i>OR</i> <b>TITLE:</b> (Problematic use) <i>OR</i> <b>TITLE:</b> (Excessive use) <i>AND</i> <b>TITLE:</b> (Adults) <i>NOT</i> <b>TOPIC:</b> (Children)<br><br>Refined by: LANGUAGES: ( ENGLISH ) AND Open Access: ( OPEN ACCESS ) AND Open Access: ( All Open Access ) AND DOCUMENT TYPES: ( ARTICLE ) AND LANGUAGES: ( ENGLISH ) AND Open Access: ( All Open Access ) AND DOCUMENT TYPES: ( ARTICLE ) | <b>1257</b>               |

|                   |                                                                                                                                                                                                                                      |            |
|-------------------|--------------------------------------------------------------------------------------------------------------------------------------------------------------------------------------------------------------------------------------|------------|
| <b>Psychoinfo</b> | Smartphone AND Addiction OR Overuse OR Problematic use OR Excessive use AND Adults<br>Limiters - Full Text; Published Date: 20110101-20200431; Peer Reviewed; Open Access; Age Groups: Adulthood (18 yrs & older); Language: English | <b>203</b> |
|-------------------|--------------------------------------------------------------------------------------------------------------------------------------------------------------------------------------------------------------------------------------|------------|
